CORRECTION

## Correction: The forkhead transcription factor Foxj1 controls vertebrate olfactory cilia biogenesis and sensory neuron differentiation

Dheeraj Rayamajhi, Mert Ege, Kirill Ukhanov, Christa Ringers, Yiliu Zhang, Inyoung Jeong, Percival P. D’Gama, Summer Shijia Li, Mehmet Ilyas Cosacak, Caghan Kizil, Hae-Chul Park, Emre Yaksi, Jeffrey R. Martens, Steven L. Brody, Nathalie Jurisch-Yaksi, Sudipto Roy

The sixth author’s name is spelled incorrectly. The correct name is: Inyoung Jeong. The correct citation is: Rayamajhi D, Ege M, Ukhanov K, Ringers C, Zhang Y, Jeong I, et al. (2024) The forkhead transcription factor Foxj1 controls vertebrate olfactory cilia biogenesis and sensory neuron differentiation. PLoS Biol 22(1): e3002468. <https://doi.org/10.1371/journal.pbio.3002468>.

### Reference

1. Rayamajhi D, Ege M, Ukhanov K, Ringers C, Zhang Y, Jung I, et al. The forkhead transcription factor Foxj1 controls vertebrate olfactory cilia biogenesis and sensory neuron differentiation. PLoS Biol. 2024;22(1):e3002468. <https://doi.org/10.1371/journal.pbio.3002468> PMID: [38271330](https://pubmed.ncbi.nlm.nih.gov/38271330/)

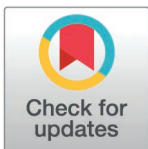

### OPEN ACCESS

**Citation:** Rayamajhi D, Ege M, Ukhanov K, Ringers C, Zhang Y, Jeong I, et al. (2025) Correction: The forkhead transcription factor Foxj1 controls vertebrate olfactory cilia biogenesis and sensory neuron differentiation. PLoS Biol 23(6): e3003229. <https://doi.org/10.1371/journal.pbio.3003229>

**Published:** June 10, 2025

**Copyright:** © 2025 Rayamajhi et al. This is an open access article distributed under the terms of the [Creative Commons Attribution License](https://creativecommons.org/licenses/by/4.0/), which permits unrestricted use, distribution, and reproduction in any medium, provided the original author and source are credited.
